## RESEARCH ARTICLE

# *Arthrospira platensis* nanoparticles dietary supplementation improves growth performance, steroid hormone balance, and reproductive productivity of Nile tilapia (*Oreochromis niloticus*) broodstock

Mohamed M. Mabrouk<sup>1</sup>, Mohamed Ashour<sup>2\*</sup>, Elsayed M. Younis<sup>3</sup>, Abdel-Wahab A. Abdel-Warith<sup>3</sup>, Mohamed A. Bauomi<sup>1</sup>, Mohamed M. Toutou<sup>2</sup>, Ahmed I. A. Mansour<sup>2</sup>, Basem S. Abdelaty<sup>2</sup>, Mohamed A. Elokaby<sup>2</sup>, Simon J. Davies<sup>4\*</sup>, Ehab El-Haroun<sup>5</sup>, Ahmed G. A. Gwida<sup>1</sup>

**1** Faculty of Agriculture in Cairo, Department of Fish Production, Al-Azhar University, Cairo, Egypt, **2** National Institute of Oceanography and Fisheries (NIOF), Cairo, Egypt, **3** Department of Zoology, College of Science, King Saudi University, Riyadh, Saudi Arabia, **4** Carna Research Station, Ryan Institute, Aquaculture Nutrition Research Unit ANRU, College of Science and Engineering, University of Galway, Galway, Ireland, **5** Faculty of Agriculture, Animal Production Department, Fish Nutrition Research Laboratory, Cairo University, Cairo, Egypt

\* [sjdaqfeed@gmail.com](mailto:sjdaqfeed@gmail.com) (SD); [microalgae\\_egypt@yahoo.com](mailto:microalgae_egypt@yahoo.com) (MA)

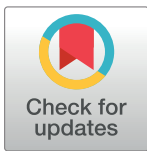

## OPEN ACCESS

**Citation:** Mabrouk MM, Ashour M, Younis EM, Abdel-Warith A-WA, Bauomi MA, Toutou MM, et al. (2024) *Arthrospira platensis* nanoparticles dietary supplementation improves growth performance, steroid hormone balance, and reproductive productivity of Nile tilapia (*Oreochromis niloticus*) broodstock. PLoS ONE 19(6): e0299480. <https://doi.org/10.1371/journal.pone.0299480>

**Editor:** Mohammed Fouad El Basuini, Tanta University Faculty of Agriculture, EGYPT

**Received:** November 18, 2023

**Accepted:** February 10, 2024

**Published:** June 25, 2024

**Copyright:** © 2024 Mabrouk et al. This is an open access article distributed under the terms of the [Creative Commons Attribution License](https://creativecommons.org/licenses/by/4.0/), which permits unrestricted use, distribution, and reproduction in any medium, provided the original author and source are credited.

**Data Availability Statement:** All relevant data are within the paper.

**Funding:** This work was supported by Researchers Supporting Project Number (RSP2024R36), King Saud University, Riyadh, Saudi Arabia. The funder had a role in the data analysis and preparation of the manuscript.

## Abstract

This study evaluates the impact of dietary supplementation of the blue-green alga *Arthrospira platensis* NIOF17/003 nanoparticles (AN) on the growth performance, whole-body biochemical compositions, blood biochemistry, steroid hormonal, and fry production efficiency of Nile tilapia (*Oreochromis niloticus*) broodstock, during the spawning season. After a 21-day preparation period to equip the females and ensure that their ovaries were filled with eggs, mating between the mature females and males took place in a 3:1 ratio during a 14-day spawning cycle. A total of 384 tilapia broodstock 288 females and 96 males with an initial body weight of 450.53±0.75, were divided into four groups; AN<sub>0</sub>: a basal diet as a control group with no supplementation of *Arthrospira platensis*, and the other three groups (AN<sub>2</sub>, AN<sub>4</sub>, and AN<sub>6</sub>) were diets supplemented with nanoparticles of *A. platensis* at levels of 2, 4, and 6 g kg<sup>-1</sup> diet, respectively. The results found that fish-fed group AN<sub>6</sub> showed the highest significant differences in weight gain (WG), final weight (FW), feed conversion ratio (FCR), protein efficiency ratio (PER), and feed efficiency ratio (FER). Females fed the AN<sub>6</sub> diet showed the highest significant fat content. Compared to the AN<sub>0</sub> group, fish fed on the supplemented diets showed significant improvement ( $p < 0.05$ ) in triglyceride, glucose, and aspartate aminotransferase (AST). A gradual increase in AN inclusion level resulted in a gradual increase in the concentrations of luteinizing hormone (LH), and follicle-stimulating hormone (FSH), testosterone, progesterone, and prolactin. The rates (%) of increase in fry production for females fed supplemented diets were 10.5, 18.6, and 32.2% for AN<sub>2</sub>, AN<sub>4</sub>, and AN<sub>6</sub>, respectively, compared to the control group. This work concluded that the inclusion levels of 6 g kg<sup>-1</sup> of *A. platensis* nanoparticles in the diet of Nile tilapia broodstock

**Competing interests:** The authors have declared that no competing interests exist.

significantly improved the growth performances, steroid hormone concentrations, and increased the fry production efficiency by 32.2%, respectively. These findings revealed that *A. platensis* nanoparticles resulted in a significantly enhanced female' reproductive productivity of Nile tilapia broodstock.

## 1. Introduction

Aquaculture development and sustainability are directly influenced by several factors as global environmental, economic, and political issues such as feed ingredient availability, diet cost production, wars, pandemics, water quality, climate change, ocean productivity, plankton communities, productivity, and nutritional values [1,2]. Globally, tilapia culture has experienced a sharp expansion over the past two decades and is farmed in more than 130 countries worldwide [3]. Tilapia is currently the second most important farmed finfish species in the world [4]. Global production of farmed tilapia grew by 3.3% in 2020 to top 6 million tons for the first time, despite the impact of COVID-19. The expansion of tilapia production all over the world is due to its ability to be produced in various aquatic environments, selective breeding, and its potential to replace marine fish products [1,5,6].

Although several factors limit aquaculture development, such as feeding costs, diseases, bad water quality, the low performance of broodstock, and the high mortality rate in seeds [7,8], several strategic approaches have been recently adopted in aquaculture to sustain tilapia production [9]. One such approach is the production of functional feed that contains health promoters and immune stimulants. Functional feed additives have become the main component of any strategy to control disease outbreaks in aquaculture, particularly when opportunistic bacteria are suspected to be a major cause of mortality [10]. Several functional feed additives have been utilized such as binders, algae derivatives, antimicrobials, seaweed extracts, antioxidants, and enzymes, which improve feed and water quality [11–16]. Other feed additives improve animal performance and health such as immunostimulants probiotics, photogenic, and prebiotics [17–21].

Microalgae recognized with its high amount of bioactive materials, which is significantly higher than any other organisms, microalgae are still utilized in many industries such as human food supplements [22,23], aquaculture feed-additives, water-conditioners [8], phytoremediation [24–28], antimicrobial activities [29,30], cosmetics substances [31–33], pharmaceuticals [34], and biodiesel [28,35–37]. Commonly, *Arthrospira* (*Spirulina*), the blue-green algae, have high protein (50–70% of DW), lipids (5–11%), essential fatty acids (AA, EPA, and DHA), pigments (carotenoid and phycocyanin), minerals (Fe and Ca), vitamins (B<sub>12</sub> and pro-vitamin A), antioxidant activities, and several molecules which have positively stimulate the attractiveness of a fish diets [38–40]. Therefore, *Arthrospira* is the most family produced around the world due to many reasons [13].

Currently, *Arthrospira* species has been significantly utilized as a feed additive resulting in improved growth performance, feed digestibility, body composition, reduced oxidative damage, and enhanced immune system [8,41,42] for many aquatic animals such as Nile tilapia [6,43,44], hybrid red tilapia (*Oreochromis mossambicus* × *O. niloticus*) [45,46], common carp (*Cyprinus carpio*) [47], Indian major carps, catla and rohu [48], grass carp (*Ctenopharyngodon idella*) [49], rainbow trout (*Oncorhynchus mykiss*) [50], Yellow river carp (*Cyprinus carpio*) [51], Asian seabass (*Lates calcarifer*) [52], European seabass (*Dicentrarchus labrax*) [53], red sea bream (*Pagrus major*) [54], Pacific whiteleg shrimp (*Penaeus vannamei*) [55], shrimp (*Fenneropenaeus chinensis*) [56], black tiger shrimp (*Penaeus monodon*) [57], and green tiger

shrimp (*Penaeus semisulcatus*) [55]. There is a positive relationship between dietary microalgae inclusion, especially *Arthrospira*, and the reproductive performance of aquatic animals. As indicated by several studies [58–60], *Arthrospira* sp. supplementation has notable impacts on reproductive performance through its involvement in hormonal regulation, specifically concerning the reproductive system. It enhances fertility, restores the antioxidant status of the ovary, and contributes to ovary signaling. Beresto [61] found that supplementing female minks with *Spirulina* at doses of 200 and 400 mg/animal resulted in a decrease in the percentage of abortive females, while simultaneously increasing litter size. This finding is consistent with previous research conducted on nanny goats and doe rabbits, which also demonstrated improved litter size with *Spirulina* supplementation [60]. In another study, Iatrou et al. [62] reported that *Arthrospira*-treated female mink tended to an increased whelping rate.

Besides its applications as aqua feed additives, *Arthrospira* or its derivatives have many biotechnological applications. The lipid-free dry weight (biodiesel byproduct) of *A. platensis* NIOF17/003 was successively utilized as dry feed for rotifer (*Brachiounus plicatilis*), in the same line to remove ammonia and organic dye from aquaculture wastewater effluents and industrial textile effluents, respectively [63,64]. The growth of aquaculture has raised the demand for better diets and aqua-feed additives. Recently, several studies have documented different forms of aqua-feed additives in aquaculture feed. The form of feed-additive inclusion is of high importance to maximize the utilization of added materials [65]. Recently, interest in using nanoparticles of several materials as animal feed additives has been expanded attributed to the higher bioavailability and efficiency [57].

Nanotechnology applications have been successfully increased [66–68]. Algae nanoparticle applications in aqua feed diets also increased due to their high of their high surface area of nanoparticles [69] which enhances growth performance, feed utilization, body composition, stress tolerance, and enhanced immune system for many species such as Nile tilapia [42,70], Pacific white shrimp [42], black tiger shrimp [57], and Zebrafish [71]. The current study aims to evaluate the effect of the cyanobacterium species, *Arthrospira platensis* NIOF17/003 nanoparticles, as a functional feed additive on growth performances, whole-body biochemical composition, blood biochemistry, steroid hormonal status, and seeds production efficiency for the Nile tilapia broodstock during the spawning cycle.

## 2. Materials and methods

### 2.1. *Arthrospira platensis* NIOF17/003 nanoparticles

As previously described [8], *Arthrospira (Spirulina) platensis* NIOF17/003 was isolated from a saline-alkaline lake named El-Khadra Lake located in Wadi El-Natron, north-west of Egypt, genetically identified, and deposited in the GenBank database with accession number: MW396472. The biomass productivity ( $143.82 \text{ mg L}^{-1} \text{ day}^{-1}$ ), lipid productivity ( $14.37 \text{ mg L}^{-1} \text{ day}^{-1}$ ), total protein (52.03% of dry weight base), total carbohydrates (14%), total lipids (8.52%), and fatty acid profiles of saturated (42.27%), monounsaturated (26.71%), polyunsaturated (31.04%), and  $\omega$ -3 (3.16%) fatty acids of *A. platensis* NIOF17/003 are determined by [63]. The nanoparticles preparation of *A. platensis* was performed, at the Egyptian Petroleum Research Institute (EPRI), Nasr City, Cairo, Egypt, using Ball grinding (Planetary Ball Mill PM 400 “4 grinding stations”) as described in a previous study [8]. Compared to the normal particle size of *A. platensis* (with an average of  $100 \mu \text{ mL}^{-1}$ ), the nanoparticle size of *A. platensis* (averaged of 87.6%) revealed a nanoparticle average of 183.9 nm, as reported in our previous studies [8,42]. Moreover, the GC-mass phytochemical analysis was determined as described by our previous studies [8,41]. It was reported that the bioactive compounds found in *A. platensis* nanoparticles, which are used in the current study, were found to contain three main bioactive

Table 1. Water quality parameters during the spawning cycle experiment.

| Water quality parameters                | Experimental diets       |                          |                          |                          |
|-----------------------------------------|--------------------------|--------------------------|--------------------------|--------------------------|
|                                         | AN <sub>0</sub>          | AN <sub>2</sub>          | AN <sub>4</sub>          | AN <sub>6</sub>          |
| pH                                      | 7.30±0.09                | 7.42±0.01                | 7.38±0.13                | 7.53±0.28                |
| Salinity (ppt)                          | 0.98±0.02 <sup>a</sup>   | 0.90±0.02 <sup>b</sup>   | 0.99±0.02 <sup>a</sup>   | 0.97±0.01 <sup>a</sup>   |
| Temperature (°C)                        | 25.84±0.90 <sup>a</sup>  | 26.25±0.87 <sup>a</sup>  | 25.46±0.84 <sup>ab</sup> | 26.65±0.75 <sup>a</sup>  |
| DO (mg L <sup>-1</sup> )                | 6.62±0.09 <sup>ab</sup>  | 6.57±0.01 <sup>b</sup>   | 6.91±0.13 <sup>a</sup>   | 6.83±0.08 <sup>a</sup>   |
| NO <sub>2</sub> (mg L <sup>-1</sup> )   | 0.181±0.015 <sup>a</sup> | 0.183±0.042 <sup>a</sup> | 0.171±0.042 <sup>b</sup> | 0.182±0.011 <sup>a</sup> |
| NH <sub>3</sub> (mg L <sup>-1</sup> )   | 0.110±0.001              | 0.107±0.016              | 0.111±0.015              | 0.109±0.007              |
| (NO <sub>3</sub> , mg L <sup>-1</sup> ) | 0.202±0.023              | 0.203±0.018              | 0.202±0.005              | 0.224±0.003              |

\*AN<sub>0</sub>, AN<sub>2</sub>, AN<sub>4</sub>, and AN<sub>6</sub>: Diets supplemented with *A. platensis* nanoparticles at levels of 0, 2, 4, and 6 g kg<sup>-1</sup> diet, respectively. The presented data are Means ± SD ( $n = 3$ ). Different letters in the same row are significantly different ( $p < 0.05$ ). The absence of letters in the same row means no significant differences.

<https://doi.org/10.1371/journal.pone.0299480.t001>

compounds, namely: (1) milbemycin b (C<sub>33</sub>H<sub>46</sub>ClNO<sub>7</sub>), which accounted for 66% of the total peak areas (PAs), (2) Docosanoic acid 1,2,3-propanetriyl ester (C<sub>69</sub>H<sub>134</sub>O<sub>6</sub>), accounting for 22% of the total PAs, and (3) Copper etioporphyrin II (C<sub>32</sub>H<sub>36</sub>CuN<sub>4</sub>), accounting for 11% of the total PAs. These three bioactive compounds belong to different categories (macrocyclic lactones, fatty acid propanetriyl ester, and metal Porphyrin Complex, respectively) and exhibit antioxidant, antimicrobial, and biomedical activities [72].

## 2.2. Water quality indices

Following the guidelines of APHA [73], water quality parameters of ammonia (NH<sub>3</sub>, mg L<sup>-1</sup>), nitrate (NO<sub>3</sub>, mg L<sup>-1</sup>), nitrite (NO<sub>2</sub>, mg L<sup>-1</sup>), and dissolved oxygen (DO, mg L<sup>-1</sup>) were determined three times a week. Furthermore, pH, salinity (ppt), and temperature (°C) were determined daily (1.00 pm) during the experimental period and Table 1 shows the water quality parameter during the experimental period. During the 14-days spawning cycle and the 21-day equipping period, all remarkable water qualities were within the recommended range of production requirements of Nile tilapia broodstock during the spawning season.

## 2.3. Nile tilapia (*Oreochromis niloticus*) broodstock

**2.3.1. Experimental fish and design.** The current experiment was carried out in a private Tilapia hatchery located in Port Said Governorate, Egypt. Nile tilapia broodstock (males and females) was obtained from a commercial farm of Nile tilapia located in Port Said Governorate, Egypt. The fish were given a control-based diet for 21 days before starting the feeding trial to initiate the spawning cycle. After 21 days of acclimation, during which the females' ovaries were investigated to be ready for spawning, mating took place between males and females in a 3:1 ratio for 14 days. In the current experiment, the main source of water was the irrigation water of the El-Slam Canal, and the rate of daily freshwater change was 30%. Daily, fish faeces, unconsumed feed, and wastes were removed by siphoning. The tanks were aerated using an air blower. The experiment was conducted with four groups, in a greenhouse with 12 concrete tanks of 8 m<sup>3</sup> (2 m x 4 m x 1 m) each. A total 384 of Nile tilapia broodstock (288 females and 96 males) were divided into four groups, each having three replicates.

**2.3.2. Experimental diet.** As presented in Table 2, four diets were used in this study: AN<sub>0</sub>: a basal diet as a control group, while the other three groups (AN<sub>2</sub>, AN<sub>4</sub>, and AN<sub>6</sub>) were basal diet supplemented with nanoparticles of *A. platensis* at levels of 2, 4, and 6 g kg<sup>-1</sup> diet, respectively. The addition of respective levels of *A. platensis* nanoparticles to diets was performed as previously described by Mabrouk et al. [8]. Briefly, The prepared nanoparticle powder of *A.*

**Table 2. Composition analysis (%) of the experimental diets.**

| Diets Composition and analysis                                                          | Experimental diets |                 |                 |                 |
|-----------------------------------------------------------------------------------------|--------------------|-----------------|-----------------|-----------------|
|                                                                                         | AN <sub>0</sub>    | AN <sub>2</sub> | AN <sub>4</sub> | AN <sub>6</sub> |
| Composition (% of dry weight)*                                                          |                    |                 |                 |                 |
| Fish meal                                                                               | 14                 | 14              | 14              | 14              |
| Soybean meal                                                                            | 20                 | 20              | 20              | 20              |
| Yellow corn                                                                             | 25                 | 25              | 25              | 25              |
| Rice bran                                                                               | 15                 | 15              | 15              | 15              |
| Wheat bran                                                                              | 15                 | 15              | 15              | 15              |
| Corn gluten                                                                             | 7                  | 7               | 7               | 7               |
| Soya oil                                                                                | 3                  | 3               | 3               | 3               |
| Dicalcium phosphate                                                                     | 0.7                | 0.7             | 0.7             | 0.7             |
| Premix Mixer                                                                            | 0.3                | 0.3             | 0.3             | 0.3             |
| Total                                                                                   | 100                | 100             | 100             | 100             |
| <i>Arthrospira platensis</i> nanoparticles supplementation levels (g kg <sup>-1</sup> ) | 0                  | 2               | 4               | 6               |

\*AN<sub>0</sub>, AN<sub>2</sub>, AN<sub>4</sub>, and AN<sub>6</sub>: Diets supplemented with *Arthrospira platensis* nanoparticles at levels of 0, 2, 4, and 6 g kg<sup>-1</sup> diet, respectively. Each 1 kg premix contains (mg kg<sup>-1</sup>): P-amino benzoic acid (9.48), D-biotin (0.38), inositol (379.20), niacin (37.92); Ca-pantothenate (56.88), Pyridoxine-HCl (11.38), riboflavin (7.58), Thiamine-HCl (3.79), L-ascorbyl-2-phosphate Mg (296.00), folic acid (0.76), cyanocobalamin (0.08), menadione (3.80), vitamin A-palmitate (17.85), a-tocopherol (18.96), calciferol (1.14), K<sub>2</sub>PO<sub>4</sub> (2.011), Ca<sub>3</sub>(PO<sub>4</sub>)<sub>2</sub> (2.736), Mg SO<sub>4</sub>·7H<sub>2</sub>O (3.058), and NaH<sub>2</sub>PO<sub>4</sub>·2H<sub>2</sub>O (0.795).

<https://doi.org/10.1371/journal.pone.0299480.t002>

*platensis* nanoparticle was dissolved in an adequate volume of distilled water and set aside to be mixed with the remaining diet ingredients. The diet ingredients were formulated by thoroughly combining and the *A. platensis* nanoparticles were sprayed on four sets of the experimental diets at the rates of 0, 2, 4, and 6 g/kg diet. Following this, the oil and water were mixed extensively with the ingredients, and the mixture was pelleted using the Sprout-Waldron Laboratory Pellet Mill (CPM, California Pellet Mill Co., USA) to create 2 mm pellets. The pellets were then dried in ovens at 40 °C until the moisture level dropped below 10% [8]. The biochemical composition of basal diet, based on the % of dry matter bases, of crude protein (29.9%), ether extract (9.2%), crude fiber (4.7%), nitrogen-free extract (48.7%), ash (7.5%), gross energy (4963 kJ kg<sup>-1</sup> diet), and digestible energy (3520 kJ kg<sup>-1</sup> diet) were calculated according to the reported guideline of AOAC [74]. Fish were hand-fed three times daily, at 9 am, 12 pm, and 4 pm, at a rate equivalent to 3% of their wet body weight.

## 2.4. Tested parameters

**2.4.1. Growth indices.** At the end of the rearing trial, fish were starved for 24 h to empty the digestive tract [75]. After that, the total body weight and the total number of each replicate were investigated to calculate weight gain (WG), specific growth rate (SGR), feed conversion ratio (FCR), protein efficiency ratio (PER), and survival rate (SR) using the given formulas.

To calculate weight gain (WG), the initial weight (IW, 450.53 ± 0.75) and final weight (FW) of mothers were determined before and after the 14-days spawning cycle experiment. No mortality was observed during the experiment. Moreover, the indices of feed conversion ratio (FCR), protein intake (PI), protein efficiency ratio (PER), and feed efficiency ratio (FER) were calculated as described below.

$$WG (g) = FBW - IBW \quad (1)$$

where, FBW and IBW are the final and initial body weight (g), respectively.

$$\text{SGR (\%, day)} = 100 \times (\ln \text{FBW} - \ln \text{IBW})/t \quad (2)$$

where, ln = natural logarithmic; and t = time in days.

$$\text{Feed conversion ratio (FCR)} = \text{Dry weight of feed consumed (g)} / \text{weight gain (g)} \quad (3)$$

$$\text{Protein efficiency ratio (PER)} = \text{Weight gain (g)} / \text{Protein fed (g)} \quad (4)$$

$$\text{SR (\%)} = 100 \times (\text{Final Number} / \text{Initial Number}) \quad (5)$$

**2.4.2. Biochemical analysis.** At the end of a 14-day spawning cycle experiment, fish in all dietary treatments were starved for 24 h, and five fish (three females and two males) were randomly collected, homogenized, dried, ground, and stored under  $-20^{\circ}\text{C}$  for whole-body analysis as described elsewhere [41]. The whole-body biochemical composition of fish and diets were determined, and moisture, dry matter (DM), crude protein (CP), ether extract (EE), crude fiber (CF), nitrogen-free extract (NFE), gross energy (GE), and digestible energy (DE) were determined and calculated according to the guideline of AOAC [74].

**2.4.3. Blood serum analysis.** At the end of the experiment, six fish samples (three males and three females) from each replicate were anesthetized using TMS buffered (Tricaine Methanesulfonate at the dose of  $30 \text{ mg L}^{-1}$ ) to collect blood serum for blood biochemistry analysis protocol as previously described by Ferguson et al. [76]. Blood samples were extracted using a sterilized hypodermic syringe (3 mL with a 22-gauge needle and a heparinized tube) and stored at room temperature for 30 minutes and then centrifuged at 3,000 RPM for 15 m. The collected serum was stored at  $-20^{\circ}\text{C}$  for further analysis. The concentration of total protein ( $\text{g dL}^{-1}$ ) [77] and albumin ( $\text{g dL}^{-1}$ ) [78] were measured, and the globulin level ( $\text{g dL}^{-1}$ ) was calculated as the difference between the values of total protein and albumin. The levels of glucose ( $\text{mg dL}^{-1}$ ) [79] and triglyceride (TAG) ( $\text{mg dL}^{-1}$ ) [80] levels were measured using kits from El-Nasr Pharmaceutical Chemicals Co., Egypt, following the provided instructions. Moreover, using the calorimetric techniques, the activities of serum glutamic pyruvate transaminase (GPT,  $\text{U mL}^{-1}$ ) [81]. Aspartate aminotransferase (AST,  $\text{U mL}^{-1}$ ), and alanine (ALT,  $\text{U mL}^{-1}$ ) were determined according to [82] using commercial kits from Biodiagnostic in Egypt, as per the manufacturer's guidelines.

**2.4.4. Steroid hormones (SHs).** At the end of the spawning trial, from each replicate, six mothers' samples (three males and three females) were randomly selected to determine SHs. For both males and females, luteinizing hormone (LH), and follicle-stimulating hormone (FSH) were determined. For males only, total testosterone (TT) and free testosterone (FT) were determined. For females only, prolactin and progesterone hormones were determined. The SHs were calorimetry determined using ELISA assay as described elsewhere [83], an enzyme-linked immune sorbent, known as the Immulite/Immulite 1000 system [84]. The fish-specific commercial kits of FSH (RAB0660-1KT), LH (SE120071), TT (SE120120), FT (SE120120), PRO (RAB0408-1KT), and PRG (SE120087) were determined, following to the manufacturer's instructions.

**2.4.5. Females reproductive productivity.** After the 14-days spawning trial, the adult fish were carefully gathered and transferred to different ponds, while lowering the water level. The method described by El-Sayed et al. [85] was followed to collect the eggs. The number of

offspring produced by each female was calculated using the following formula:

$$\text{Number of fries per female} = \frac{\text{Total number of seeds/pond}}{\text{Total number of females/pond}} \quad (6)$$

The average ratio (%) of the number of seeds from mothers fed the control diet to the supplemented diets was conducted as the following Eq.:

$$\text{Number of seeds per female} = \frac{S_n - S_c}{S_c} \times 100 \quad (7)$$

Where  $S_n$  and  $S_c$  are the numbers of seeds that come from mothers fed the supplemented and the control diets, respectively.

## 2.5. Statistical analysis

The data were assessed for homoscedasticity and normality before conducting statistical analysis. The results were presented as mean  $\pm$  standard deviation ( $n = 3$ ). The statistical analysis was performed using the SPSS computer software package. To determine significant differences among means at a  $p$ -value of less than 0.05, a one-way ANOVA was performed followed by Duncan's multiple-range tests. The graphical representation of the steroid hormone levels and broodstock seed production figures was created using GraphPad Prism version 9.

## 3. Results

### 3.1. Growth indices

The growth performances of Nile tilapia, during the spawning cycle, are presented in Table 3. Significant differences ( $p < 0.05$ ) were revealed in FW, WG, FCR, PER, and FER between the control group ( $AN_0$ ) and the groups supplemented with *A. platensis* nanoparticles ( $AN_2$ ,  $AN_4$ , and  $AN_6$ ). However, fish-fed group  $AN_6$  showed the highest significant differences ( $p < 0.05$ ) in FW, WG, FCR, PER, and FER.

### 3.2. Whole-body proximate composition

Fig 1 shows the approximate whole-body compositions (protein, lipid, ash, and moisture) of Nile tilapia fed the control diets and the diets supplemented with *A. platensis* nanoparticles. Compared to the control group, both males and females fed with supplemented diets ( $AN_2$ ,

**Table 3. Growth performance indices of *O. niloticus* broodstock during the spawning season.**

| Growth performance indices | Experimental diets             |                                |                                |                                |
|----------------------------|--------------------------------|--------------------------------|--------------------------------|--------------------------------|
|                            | $AN_0$                         | $AN_2$                         | $AN_4$                         | $AN_6$                         |
| IW (g)                     | 450.53 $\pm$ 0.75              | 450.47 $\pm$ 0.80              | 450.07 $\pm$ 0.42              | 450.03 $\pm$ 0.21              |
| FW (g)                     | 456.00 $\pm$ 0.36 <sup>b</sup> | 455.87 $\pm$ 0.35 <sup>b</sup> | 456.10 $\pm$ 0.87 <sup>b</sup> | 458.69 $\pm$ 0.42 <sup>a</sup> |
| WG (g)                     | 5.47 $\pm$ 0.58 <sup>b</sup>   | 5.41 $\pm$ 1.06 <sup>b</sup>   | 6.80 $\pm$ 1.01 <sup>ab</sup>  | 8.65 $\pm$ 1.30 <sup>a</sup>   |
| FCR                        | 1.97 $\pm$ 0.05 <sup>a</sup>   | 1.99 $\pm$ 0.02 <sup>a</sup>   | 1.78 $\pm$ 0.06 <sup>a</sup>   | 1.41 $\pm$ 0.21 <sup>b</sup>   |
| PI (g)                     | 3.29 $\pm$ 0.34                | 3.28 $\pm$ 0.65                | 3.58 $\pm$ 0.69                | 3.58 $\pm$ 0.08                |
| PER                        | 0.51 $\pm$ 0.012 <sup>b</sup>  | 0.50 $\pm$ 0.006 <sup>b</sup>  | 0.56 $\pm$ 0.021 <sup>b</sup>  | 0.72 $\pm$ 0.101 <sup>a</sup>  |
| FER                        | 1.66 $\pm$ 0.042 <sup>b</sup>  | 1.65 $\pm$ 0.015 <sup>b</sup>  | 1.84 $\pm$ 0.057 <sup>b</sup>  | 2.35 $\pm$ 0.321 <sup>a</sup>  |

\*  $AN_0$ ,  $AN_2$ ,  $AN_4$ , and  $AN_6$ : Diets supplemented with *A. platensis* nanoparticles at levels of 0, 2, 4, and 6 g kg<sup>-1</sup> diet, respectively. The presented data are Means  $\pm$  SD ( $n = 3$ ). Different letters in the same row are significantly different ( $p < 0.05$ ). The absence of letters in the same row means no significant differences ( $p < 0.05$ ). WG: Weight gain, FW: Final weight, IW: Initial weight, FCR: Feed conversion ratio, PI: Protein intake, PER: efficiency ratio, and FER: Feed efficiency ratio.

<https://doi.org/10.1371/journal.pone.0299480.t003>

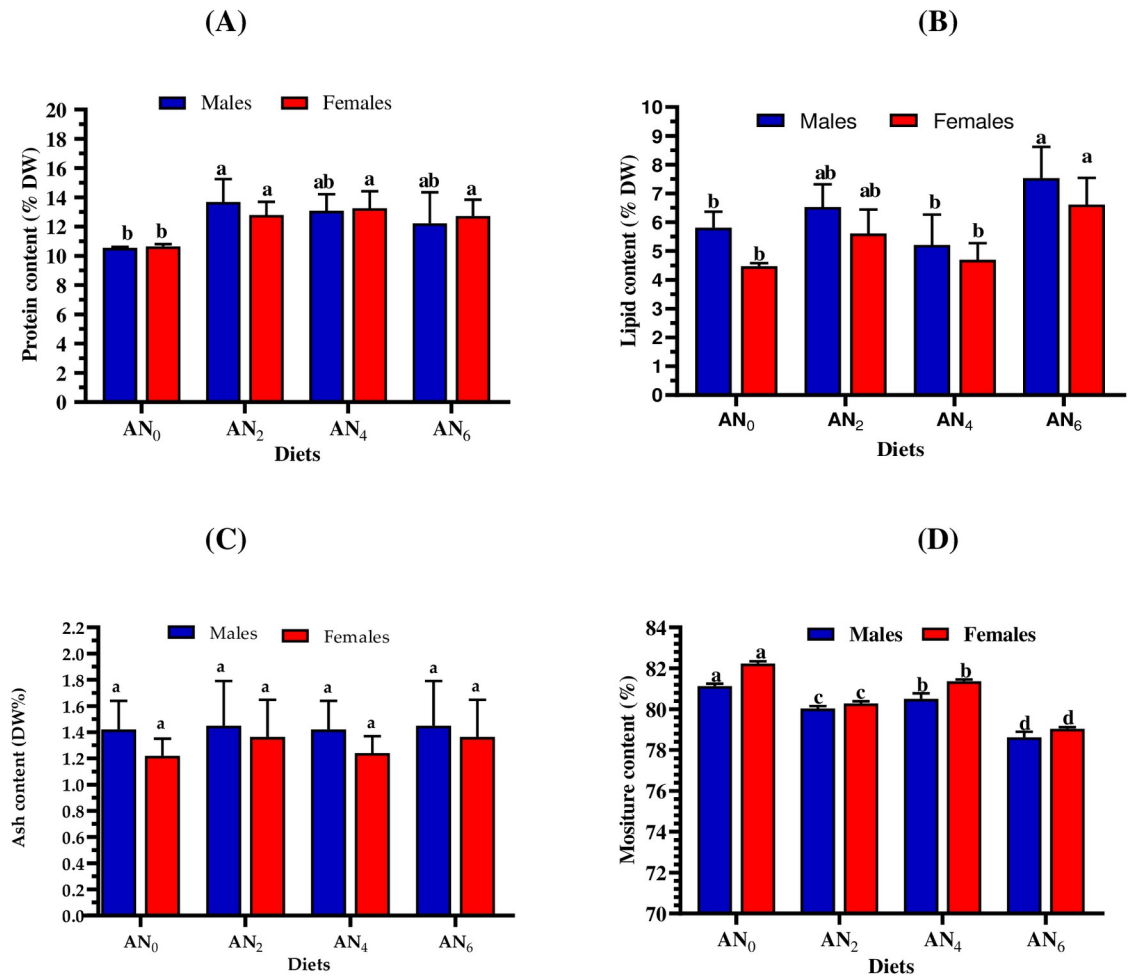

**Fig 1.** Whole body analysis contents of protein (A), lipid (B), ash (C), and moisture (D) of *O. niloticus* (males and females) fed different inclusion levels of *A. platensis* nanoparticles. AN<sub>0</sub>, AN<sub>2</sub>, AN<sub>4</sub>, and AN<sub>6</sub> are diets supplemented with *A. platensis* nanoparticles at levels of 0, 2, 4, and 6 g kg<sup>-1</sup> diet, respectively. The presented data are Means ± SD ( $n = 3$ ). Different letters in each column are significantly different ( $p < 0.05$ ).

<https://doi.org/10.1371/journal.pone.0299480.g001>

AN<sub>4</sub>, and AN<sub>6</sub>) achieved the highest protein content (Fig 1A). The highest significant ( $p < 0.05$ ) lipid content was observed by fish fed the group of AN<sub>6</sub>, followed by AN<sub>2</sub>, AN<sub>4</sub>, and AN<sub>0</sub> (Fig 1B). Among the dietary groups, no significant differences ( $p < 0.05$ ) were observed in ash content (Fig 1C), and the lowest moisture content was observed by mothers fed the control group (AN<sub>0</sub>) (Fig 1D).

### 3.4. Blood biochemistry

Table 4 shows the blood serum biochemical analysis of Nile tilapia fed different inclusion levels of *A. platensis* nanoparticles. Among the dietary groups, no significant differences ( $p < 0.05$ ) were observed in the total protein, albumin, globulin, GPT, and ALT contents. Compared to the control group, fish fed *A. platensis* nanoparticles (AN<sub>2</sub>, AN<sub>4</sub>, and AN<sub>6</sub>) showed significant differences ( $p < 0.05$ ) in TAG, glucose, and AST. The highest significant ( $p < 0.05$ ) TAG was observed in fish fed the AN<sub>4</sub> diet, followed by AN<sub>6</sub>, and AN<sub>2</sub>, while the lowest TAG content was observed in control fish. The highest significant ( $p < 0.05$ ) glucose was observed in fish fed with AN<sub>6</sub>, followed by AN<sub>4</sub>, and AN<sub>2</sub>, while the lowest glucose was revealed in fish fed the



**Table 4. Blood biochemical parameters of *O. niloticus* broodstock fed different inclusion levels of *A. platensis* nanoparticles.**

| Blood parameters                    | Experimental diets         |                             |                             |                             |
|-------------------------------------|----------------------------|-----------------------------|-----------------------------|-----------------------------|
|                                     | AN <sub>0</sub>            | AN <sub>2</sub>             | AN <sub>4</sub>             | AN <sub>6</sub>             |
| Total Protein (g dL <sup>-1</sup> ) | 6.20 ± 0.36                | 6.03 ± 0.57                 | 5.93 ± 0.93                 | 6.07 ± 0.15                 |
| Albumin (g dL <sup>-1</sup> )       | 4.47 ± 0.67                | 4.27 ± 0.15                 | 3.93 ± 0.67                 | 4.20 ± 0.46                 |
| Globulin (g dL <sup>-1</sup> )      | 1.73 ± 0.35                | 1.77 ± 0.65                 | 2.00 ± 0.26                 | 1.87 ± 0.31                 |
| Triglyceride (mg dL <sup>-1</sup> ) | 191.33 ± 7.57 <sup>b</sup> | 203.37 ± 5.51 <sup>ab</sup> | 211.33 ± 14.57 <sup>a</sup> | 203.67 ± 6.03 <sup>ab</sup> |
| Glucose (mg dL <sup>-1</sup> )      | 104.33 ± 5.03 <sup>b</sup> | 109.33 ± 5.51 <sup>ab</sup> | 116.00 ± 7.00 <sup>ab</sup> | 119.67 ± 7.51 <sup>a</sup>  |
| GPT (U mL <sup>-1</sup> )           | 27.33 ± 5.86               | 28.67 ± 5.69                | 25.67 ± 2.52                | 29.00 ± 5.29                |
| AST (U mL <sup>-1</sup> )           | 68.6 ± 2.08 <sup>a</sup>   | 64.30 ± 2.23 <sup>b</sup>   | 58.61 ± 3.46 <sup>b</sup>   | 56.43 ± 2.31 <sup>b</sup>   |
| ALT (U mL <sup>-1</sup> )           | 27.32 ± 3.38               | 28.71 ± 3.28                | 25.72 ± 1.45                | 29.17 ± 3.05                |

AN<sub>0</sub>, AN<sub>2</sub>, AN<sub>4</sub>, and AN<sub>6</sub> are diets supplemented with *A. platensis* nanoparticles at levels of 0, 2, 4, and 6 g kg<sup>-1</sup> diet, respectively. GPT: Glutamic pyruvate transaminase (U mL<sup>-1</sup>), AST: Aspartate aminotransferase (U mL<sup>-1</sup>), ALT Alanine (U mL<sup>-1</sup>). The presented data are Means ± SD ( $n = 3$ ). Different letters in the same row are significantly different ( $p < 0.05$ ), while the absence of letters means no significant differences.

<https://doi.org/10.1371/journal.pone.0299480.t004>

control diet. On the other hand, compared to the *A. platensis* nanoparticles groups, control-fed fish showed significantly ( $p < 0.05$ ) the highest AST content, followed by AN<sub>2</sub>, AN<sub>4</sub>, and AN<sub>6</sub>.

### 3.5. Steroid hormones

Figs 2–4 show the influence of different inclusion levels of *A. platensis* nanoparticles on steroid hormone concentrations in Nile tilapia males and females. Fig 2 displayed that fish-fed supplemented diets revealed a significant ( $p < 0.05$ ) improvement in FSH and LH concentrations in both females and males, compared to control-fed fish. Moreover, a gradual increase in incorporation levels of *A. platensis* nanoparticles resulted in a gradual increase in LH and FSH concentrations. Furthermore, the females showed a positive response to the gradual increase in inclusion levels higher than males (Fig 2). Fig 3 shows that the gradual increase in inclusion levels of *A. platensis* nanoparticles resulted in a gradual increase in the concentrations of testosterone (total and free). Compared to the control group, significant ( $p < 0.05$ ) improvements in total and free testosterone concentrations were obtained by males fed diets supplemented

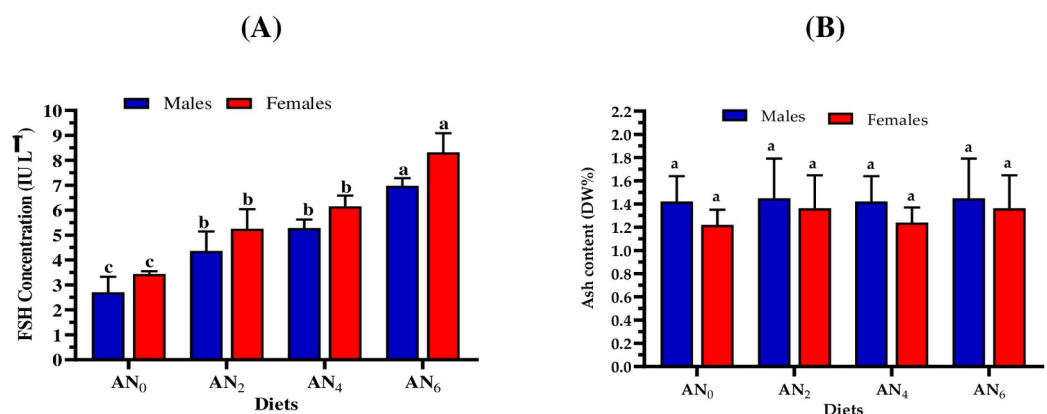

**Fig 2. Impact of different *A. platensis* nanoparticles inclusion levels on the (A) follicle-stimulating hormone, FSH, and (B) luteinizing hormone, LH, of *O. niloticus* broodstock (males and females).** AN<sub>0</sub>, AN<sub>2</sub>, AN<sub>4</sub>, and AN<sub>6</sub> are diets supplemented with *A. platensis* nanoparticles at levels of 0, 2, 4, and 6 g kg<sup>-1</sup> diet, respectively. The presented data are Means ± SD ( $n = 3$ ). Different letters in each column are significantly different ( $p < 0.05$ ).

<https://doi.org/10.1371/journal.pone.0299480.g002>

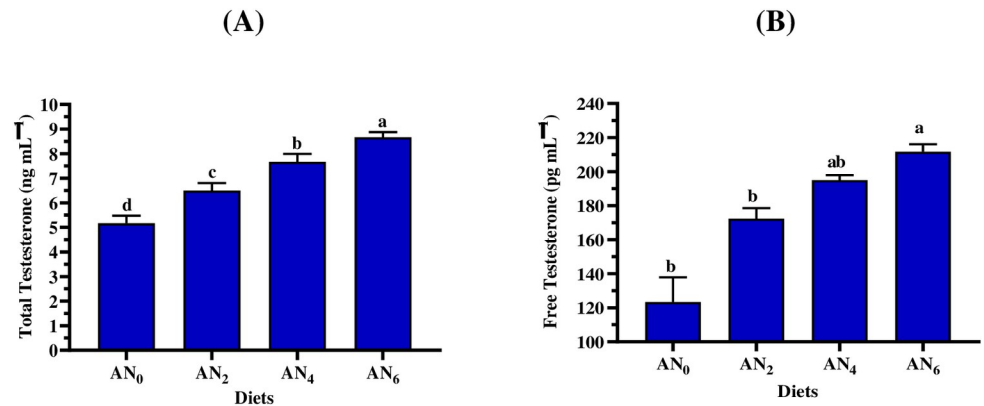

**Fig 3.** Impact of different *A. platensis* nanoparticles inclusion levels on the (A) total testosterone, and (B) free testosterone of *O. niloticus* broodstock (males only) of *O. niloticus*. AN<sub>0</sub>, AN<sub>2</sub>, AN<sub>4</sub>, and AN<sub>6</sub> are diets supplemented with *A. platensis* nanoparticles at levels of 0, 2, 4, and 6 g kg<sup>-1</sup> diet, respectively. The presented data are Means  $\pm$  SD ( $n = 3$ ). Different letters are significantly different ( $p < 0.05$ ).

<https://doi.org/10.1371/journal.pone.0299480.g003>

with *A. platensis* nanoparticles (AN<sub>2</sub>, AN<sub>4</sub>, and AN<sub>6</sub>) and (AN<sub>4</sub> and AN<sub>6</sub>), respectively. Fig 4 shows that the gradual increase in inclusion levels of *A. platensis* nanoparticles led to a gradual increase in the concentrations of progesterone and prolactin hormones. Compared to the control group, significant ( $p < 0.05$ ) improvements in progesterone and prolactin concentration were obtained by males who consumed the supplemented diets (AN<sub>4</sub> and AN<sub>6</sub>) and (AN<sub>2</sub>, AN<sub>4</sub>, and AN<sub>6</sub>), respectively.

### 3.6. Females' reproductive productivity

Fig 5 shows the impact of different inclusion levels of *A. platensis* nanoparticles on the seed's production count. A gradual increase in incorporation levels resulted in a significant ( $p < 0.05$ ) gradual increase in seed production efficiency. Compared to control-fed fish, increasing rates in seed production were noticed for AN<sub>2</sub>, AN<sub>4</sub>, and AN<sub>6</sub> diets, 10.5, 18.6, and 32.2%, respectively.

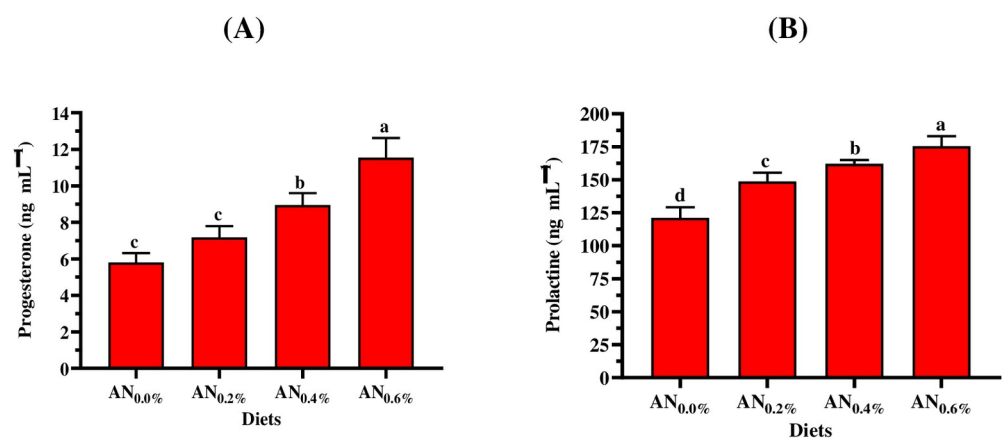

**Fig 4.** Impact of different *A. platensis* nanoparticles inclusion levels on the (A) progesterone, and (B) prolactin of *O. niloticus* (females only) of *O. niloticus*. AN<sub>0</sub>, AN<sub>2</sub>, AN<sub>4</sub>, and AN<sub>6</sub> are diets supplemented with *A. platensis* nanoparticles at levels of 0, 2, 4, and 6 g kg<sup>-1</sup> diet, respectively. The presented data are Means  $\pm$  SD ( $n = 3$ ). Different letters are significantly different ( $p < 0.05$ ).

<https://doi.org/10.1371/journal.pone.0299480.g004>

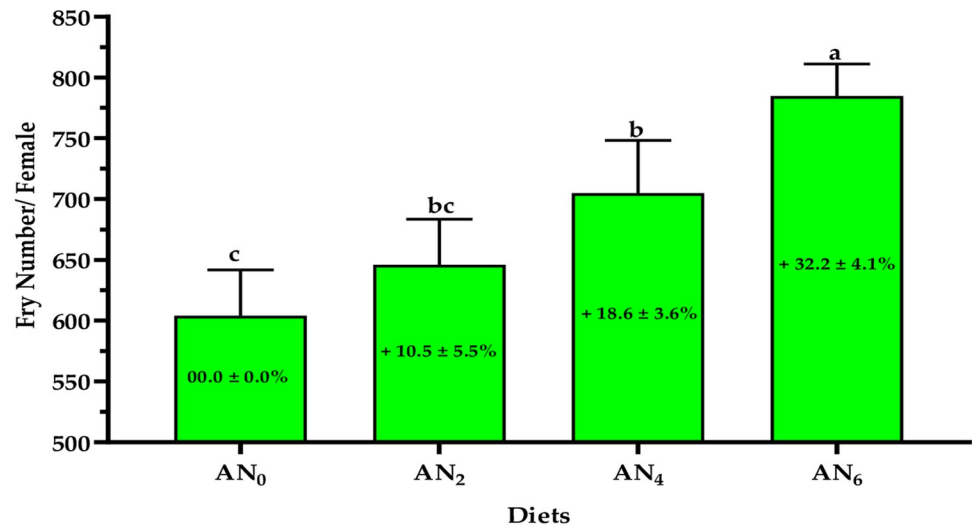

**Fig 5.** Impact of different nanoparticles inclusion levels of *A. platensis* on the seed production efficiency of *O. niloticus*. AN<sub>0</sub>, AN<sub>2</sub>, AN<sub>4</sub>, and AN<sub>6</sub> are diets supplemented with *A. platensis* nanoparticles at levels of 0, 2, 4, and 6 g kg<sup>-1</sup> diet, respectively. The presented data are Means ± SD ( $n = 3$ ). Different letters are significantly different ( $p < 0.05$ ). The percentages in the bars are the increased percentage (%) in seed production for females fed supplemented diets compared to the control diet.

<https://doi.org/10.1371/journal.pone.0299480.g005>

## 4. Discussion

According to the literature, algal cells (microalgae or seaweeds) and bioactive compounds extracted from algal such as astaxanthin from *A. platensis* [41], and polysaccharides extracted from brown seaweed (*Sargassum dentifolium*) [8,42,86] were included as feed additives in various forms as dry powder, liquid extract [65]. The nanoparticle form is the newest technology that can improve diet efficiency [70]. A study conducted by Nagarajan et al. [87] reported that these positive effects of nanoparticle forms may be due to the novel properties of highly fine particles and the high surface area of the molecules. These new properties can change, maximize, and create novel properties for the phytochemical compounds in the microalgae nanoparticle forms compared to the traditional microalgae form [88–91].

In previous studies, the bioactive compounds of *A. platensis* nanoparticles used in the present study were reported [8,41]. Three peak areas (PAs) were found in *A. platensis* nanoparticles. These three PAs were found to contain three main bioactive compounds, namely: (1) milbemycin b (C<sub>33</sub>H<sub>46</sub>ClNO<sub>7</sub>), which accounted for 66% of the total peak areas (PAs), (2) Docosanoic acid 1,2,3-propanetriyl ester (C<sub>69</sub>H<sub>134</sub>O<sub>6</sub>), accounting for 22% of the total PAs, and (3) Copper etioporphyrin II (C<sub>32</sub>H<sub>36</sub>CuN<sub>4</sub>), accounting for 11% of the total PAs. These three bioactive compounds belong to different categories (macrocyclic lactones, fatty acid propanetriyl ester, and metal Porphyrin Complex, respectively) and exhibit antioxidant, antimicrobial, and biomedical activities [72,92].

To the best of our knowledge, no study has investigated the effects of nanoparticles of microalga *A. platensis* on Nile tilapia during the spawning period. The present study showed improvement in growth performances, whole-body biochemical composition, physiological aspects, steroid hormonal status, and fry production efficiency for the Nile tilapia during the spawning cycle. The current study revealed that the AN<sub>6</sub> group has achieved the highest significant differences ( $p < 0.05$ ) in FW, WG, FCR, PER, and FER, compared to the control group (AN<sub>0</sub>) and the other supplemented groups (AN<sub>2</sub> and AN<sub>4</sub>). Elabd et al. [70] revealed that inclusion levels of 2.5–5 g kg<sup>-1</sup> of *A. platensis* nanoparticles into Nile tilapia diets significantly

improved growth performance indices. In a later study, Sharawy et al. [42] reported that the inclusion of *A. platensis* nanoparticles (2.5, 5, and 10 g kg<sup>-1</sup> diet) in a Pacific white shrimp diet significantly ( $p < 0.05$ ) improved the growth performances of shrimp fry. The findings reported in the present study reported that the inclusion concentrations (6 g kg<sup>-1</sup> diet) achieved an economic advantages regarding the growth performance. However, this small increase in FW and WF may be attributed to the fact that the broodstock at this age tends to direct all its energy to the steroid hormonal aspects, ovulation, and egg production, not to the growth and building tissues.

Aquafeeds are significantly affecting the carcass composition of aquatic animals, especially in early growth stages [93,94]. In the current study, supplemented groups significantly affected the protein and the lipid content of Nile tilapia mothers. These results are in accordance with the previous studies which concluded that the nanoparticles form of *A. platensis* inclusion levels to Nile tilapia significantly improves protein and lipid contents [8,42,70]. This finding may be attributed to the fact that *A. platensis* is a rich source of protein (50–65%) and has a high-quality fatty acid profile (AA, EPA, and DHA) with total lipid content of 4–8% [39].

Blood biochemistry indices (serum protein, albumin, TAG, glucose, GPT, AST, and ALT) are major factors in improving blood aspects, immune system, and overall physiological status of fish and act powerfully as adjuncts to assess the efficiency of feed additives [95–97]. The current study reported that the only significant difference in blood biochemistry indices was recorded in TAG, and glucose by the supplemented diets compared to the control diet. These results are in accordance with previous results of Mabrouk et al. [8], Elabd et al. [70], and Sharawy et al. [42]. However, these results may be due to the high-lipid content of *A. platensis* nanoparticles dietary supplementations [98].

To achieve successful and effective reproduction of aquatic animals, it's essential to understand the relationship between hormonal spawning and nutritional and environmental factors such as diet development, photoperiod, and temperature which sequentially, affect seed production efficiency [99,100]. In the current study, different nanoparticle inclusion levels of *A. platensis* significantly ( $p < 0.05$ ) affect hormonal spawning for Nile tilapia broodstock (males and females). The current study observed that a gradual increase in incorporation nanoparticle levels resulted in a gradual increase in hormonal spawning (FSH, LH, free testosterone, total testosterone, progesterone, and prolactin). Compared to the control group (AN<sub>0</sub>), increasing rates in fry production for the supplemented diets of AN<sub>2</sub>, AN<sub>4</sub>, and AN<sub>6</sub> were 10.5, 18.6, and 32.2%, respectively were revealed. These findings were in accordance with the results of several studies which concluded that *Arthrospira* (*Spirulina*) strains can improve the formation of ovulation, prostaglandin, and steroidogenesis, improve maturation ability, optimize the levels of sex hormones, enhance reproduction performance and hatching efficiency, and increase seeds production in fish species such as Nile tilapia [101], catfish (*Clarias gariepinus*) [102], zebrafish females [103], three-spot gourami (*Trichopodus trichopterus*) [104], yellow tail cichlid (*Pseudotropheus acei*) [105], parrot fish (*Oplegnathus fasciatus*) [106], Pla Pho (*Pangasius bocourti*) [107], and goldfish (*Carassius auratus*) [108]. Promya and Chitmanat [102] concluded that *Arthrospira* is an alternative candidate to artificial hormones in the diet of fish brooders. Interestingly, due to their novel physical properties and bioactive compounds, the nanoparticle form of *A. platensis* maximizes the nutritional benefit for Nile tilapia.

Joshua and Zulperi [98] reported that the nutritional impact and bioactive material contents of *A. platensis* and *Chlorella vulgaris*, they are algal species that can significantly enhance the immune system, reduce disease infections, improve the hormonal spawning, and improve reproduction aspects of fish and shrimp. Hassaan [109] concluded that the inclusion of 10–15 g kg<sup>-1</sup> of microalgae *Cyclotella* spp. (dried form) in the diet of Nile tilapia broodstock

significantly improved hormonal spawning, gonadosomatic index, condition factor, semen quality, and relative absolute fecundity, which consequentially improved seed production.

## 5. Conclusions

Inclusion levels of  $6 \text{ g kg}^{-1}$  of *A. platensis* nanoparticles in the diet of Nile tilapia broodstock significantly improved the growth performances (FW, WG, FCR, PER, and FER), steroid hormones levels (FSH, LH, free testosterone, total testosterone, progesterone, and prolactin), and increase fry production efficiency of 32.2%, respectively. These findings revealed that *A. platensis* nanoparticles resulted in a better enhancement of females' reproductive productivity of Nile tilapia.

## Author Contributions

**Conceptualization:** Mohamed M. Mabrouk, Mohamed Ashour.

**Data curation:** Mohamed Ashour, Ahmed G. A. Gwida.

**Formal analysis:** Mohamed Ashour, Abdel-Wahab A. Abdel-Warith.

**Funding acquisition:** Elsayed M. Younis, Abdel-Wahab A. Abdel-Warith, Basem S. Abdelaty, Ehab El-Haroun.

**Investigation:** Basem S. Abdelaty.

**Methodology:** Mohamed M. Mabrouk, Mohamed Ashour, Mohamed M. Toutou.

**Project administration:** Mohamed Ashour.

**Resources:** Simon J. Davies.

**Software:** Elsayed M. Younis, Ehab El-Haroun.

**Supervision:** Mohamed Ashour, Simon J. Davies, Ehab El-Haroun.

**Validation:** Elsayed M. Younis, Ahmed I. A. Mansour.

**Visualization:** Mohamed M. Mabrouk, Mohamed A. Bauomi, Basem S. Abdelaty.

**Writing – original draft:** Mohamed A. Elokaby, Ehab El-Haroun, Ahmed G. A. Gwida.

**Writing – review & editing:** Mohamed Ashour, Abdel-Wahab A. Abdel-Warith, Simon J. Davies.

## References

1. Ahmed N, Azra MN (2022) Aquaculture Production and Value Chains in the COVID-19 Pandemic. *Current Environmental Health Reports*: 1–13.
2. Zhao Y, Xue B, Bi C, Ren X, Liu Y (2022) Influence mechanisms of macro-infrastructure on micro-environments in the recirculating aquaculture system and biofloc technology system. *Reviews in Aquaculture*.
3. Abu-Elala NM, Ali TE-S, Ragaa NM, Ali SE, Abd-Elsalam RM, et al. (2021) Analysis of the productivity, immunity, and health performance of Nile Tilapia (*Oreochromis niloticus*) broodstock-fed dietary fermented extracts sourced from *Saccharomyces cerevisiae* (hilyses): a field trial. *Animals* 11: 815. <https://doi.org/10.3390/ani11030815> PMID: 33799378
4. FAO (2020) The state of world fisheries and aquaculture 2020: Sustainability in action: Food and Agriculture Organization of the United Nations.
5. Abu-Elala NM, Abd-Elsalam RM, Younis NA (2020) Streptococcosis, Lactococcosis and Enterococcosis are potential threats facing cultured Nile tilapia (*Oreochromis niloticus*) production. *Aquaculture research* 51: 4183–4195.

6. Sarker PK, Kapuscinski AR, McKuin B, Fitzgerald DS, Nash HM, et al. (2020) Microalgae-blend tilapia feed eliminates fishmeal and fish oil, improves growth, and is cost viable. *Scientific reports* 10: 1–14.
7. Magouz FI, Essa MA, Matter M, Mansour TA, Alkafafy M, et al. (2021) Population Dynamics, Fecundity and Fatty Acid Composition of *Oithona nana* (Cyclopoida, Copepoda), Fed on Different Diets. *Animals (Basel)* 11. <https://doi.org/10.3390/ani11051188> PMID: 33919197
8. Mabrouk MM, Ashour M, Labena A, Zaki MAA, Abdelhamid AF, et al. (2022) Nanoparticles of *Arthrospira platensis* improves growth, antioxidative and immunological responses of Nile tilapia (*Oreochromis niloticus*) and its resistance to *Aeromonas hydrophila*. *Aquaculture Research* 53: 125–135.
9. Magouz FI, Mahmoud SA, El-Morsy RA, Paray BA, Soliman AA, et al. (2021) Dietary menthol essential oil enhanced the growth performance, digestive enzyme activity, immune-related genes, and resistance against acute ammonia exposure in Nile tilapia (*Oreochromis niloticus*). *Aquaculture* 530: 735944.
10. Yao YY, Yang YL, Gao CC, Zhang FL, Xia R, et al. (2020) Surface display system for probiotics and its application in aquaculture. *Reviews in Aquaculture* 12: 2333–2350.
11. Mustafa SA, Al-Faragi JK (2021) Supplementation of Feed Additives on Aquaculture Feeds: A Review. *International Journal of Pharmaceutical Research* 13.
12. Marimuthu V, Sarawagi AD, Kumar A, Paul S, Sampath V, et al. (2022) Glimpse of Feed and Feed Additive Necessity and Mycotoxin Challenges in Aquaculture. *Aquaculture Science and Engineering*: Springer. pp. 401–430.
13. Mansour AT, Ashour M, Alprol AE, Alsaqufi AS (2022) Aquatic Plants and Aquatic Animals in the Context of Sustainability: Cultivation Techniques, Integration, and Blue Revolution. *Sustainability* 14: 3257.
14. Karim A, Naila B, Khwaja S, Hussain S, Ghafar M (2022) Evaluation of different Starch Binders on physical quality of fish feed pellets. *Brazilian Journal of Biology* 84. <https://doi.org/10.1590/1519-6984.256242> PMID: 35195178
15. Mohammadian T, Momeni H, Mesbah M, Abedini M, Khosravi M, et al. (2022) Eubiotic Effect of a Dietary Bio-Aqua® and Sodium Diformate (NaDF) on *Salmo trutta caspius*: Innate Immune System, Biochemical Indices, Antioxidant Defense, and Expression of Immunological and Growth-Related Genes. *Probiotics and Antimicrobial Proteins*: 1–13.
16. Ashour M, Mabrouk MM, Abo-Taleb HA, Sharawy ZZ, Ayoub HF, et al. (2021) A liquid seaweed extract (TAM®) improves aqueous rearing environment, diversity of zooplankton community, whilst enhancing growth and immune response of Nile tilapia, *Oreochromis niloticus*, challenged by *Aeromonas hydrophila*. *Aquaculture* 543: 736915.
17. Alemayehu TA, Geremew A, Getahun A (2018) The role of functional feed additives in tilapia nutrition. *Fisheries and Aquaculture Journal* 9: 1g–1g.
18. Suphoronski S, Chideroli R, Facimoto C, Mainardi R, Souza F, et al. (2019) Effects of a phytogenic, alone and associated with potassium diformate, on tilapia growth, immunity, gut microbiome and resistance against francisellosis. *Scientific reports* 9: 1–14.
19. Mandey JS, Sompie FN (2021) Phytogenic Feed Additives as An Alternative to Antibiotic Growth Promoters in Poultry Nutrition. *Advanced Studies in the 21st Century Animal Nutrition* 8: 19.
20. Yilmaz S (2019) Effects of dietary blackberry syrup supplement on growth performance, antioxidant, and immunological responses, and resistance of Nile tilapia, *Oreochromis niloticus* to *Plesiomonas shigelloides*. *Fish & shellfish immunology* 84: 1125–1133. <https://doi.org/10.1016/j.fsi.2018.11.012> PMID: 30414489
21. Ali G, Abeer E, El-Shenway AM, AA N (2020) Using of some phytobiotics and probiotics as promoters to cultured Nile Tilapia. *Int J Fish Aquat Stud* 8: 148–159.
22. Vieira MV, Pastrana LM, Fuciños P (2020) Microalgae encapsulation systems for food, pharmaceutical and cosmetics applications. *Marine drugs* 18: 644. <https://doi.org/10.3390/md18120644> PMID: 33333921
23. Fais G, Manca A, Bolognesi F, Borselli M, Concas A, et al. (2022) Wide Range Applications of Spirulina: From Earth to Space Missions. *Marine Drugs* 20: 299. <https://doi.org/10.3390/md20050299> PMID: 35621951
24. Essa D, Abo-Shady A, Khairy H, Abomohra AE-F, Elshobary M (2018) Potential cultivation of halophilic oleaginous microalgae on industrial wastewater. *Egyptian Journal of Botany* 58: 205–216.
25. Mansour AT, Alprol AE, Abualnaja KM, El-Beltagi HS, Ramadan KMA, et al. (2022) Dried Brown Seaweed's Phytoremediation Potential for Methylene Blue Dye Removal from Aquatic Environments. *Polymers* 14. <https://doi.org/10.3390/polym14071375> PMID: 35406248

26. Mansour AT, Alprol AE, Abualnaja KM, El-Beltagi HS, Ramadan KMA, et al. (2022) The Using of Nanoparticles of Microalgae in Remediation of Toxic Dye from Industrial Wastewater: Kinetic and Isotherm Studies. *Materials (Basel)* 15. <https://doi.org/10.3390/ma15113922> PMID: 35683218
27. Abou-Shanab RAI, El-Dalatony MM, El-Sheekh MM, Ji M-K, Salama E-S, et al. (2014) Cultivation of a new microalga, *Micractinium reisseri*, in municipal wastewater for nutrient removal, biomass, lipid, and fatty acid production. *Biotechnology and bioprocess engineering* 19: 510–518.
28. Abdelsalam IM, Elshobary M, Eladawy MM, Nagah M (2019) Utilization of multi-tasking non-edible plants for phytoremediation and bioenergy source—a review. *Phyton* 88: 69.
29. Osman MEH, Abo-shady AM, Elshobary ME (2010) In vitro screening of antimicrobial activity of extracts of some macroalgae collected from Abu-Qir bay Alexandria, Egypt. *Afr J Biotechnol* 9: 7203–7208.
30. Osman MEH, Abo-Shady AM, Elshobary ME, Abd El-Ghafar MO, Abomohra AE-F (2020) Screening of seaweeds for sustainable biofuel recovery through sequential biodiesel and bioethanol production.
31. Mourelle ML, Gómez CP, Legido JL (2017) The potential use of marine microalgae and cyanobacteria in cosmetics and thalassotherapy. *Cosmetics* 4: 46.
32. Arad SM, Yaron A (1992) Natural pigments from red microalgae for use in foods and cosmetics. *Trends in Food Science & Technology* 3: 92–97.
33. Zhuang D, He N, Khoo KS, Ng E-P, Chew KW, et al. (2021) Application progress of bioactive compounds in microalgae on pharmaceutical and cosmetics. *Chemosphere*: 132932. <https://doi.org/10.1016/j.chemosphere.2021.132932> PMID: 34798100
34. Shao W, Ebaid R, El-Sheekh M, Abomohra A, Eladel H (2019) Pharmaceutical applications and consequent environmental impacts of *Spirulina* (*Arthrospira*): An overview. *Grasas y Aceites* 70: e292–e292.
35. Abomohra AE-F, Elshobary M (2019) Biodiesel, bioethanol, and biobutanol production from microalgae. *Microalgae biotechnology for development of biofuel and wastewater treatment*: 293–321.
36. Elshobary ME, El-Shenody RA, Abomohra AEF (2021) Sequential biofuel production from seaweeds enhances the energy recovery: A case study for biodiesel and bioethanol production. *International Journal of Energy Research* 45: 6457–6467.
37. Elshobary ME, Zabed HM, Yun J, Zhang G, Qi X (2021) Recent insights into microalgae-assisted microbial fuel cells for generating sustainable bioelectricity. *International Journal of Hydrogen Energy* 46: 3135–3159.
38. Habib M, Parvin M, Huntington T, Hasan M (2008) A review on culture, production and use of spirulina as food for humans and feeds for domestic animals and fish Rome. Italy: Food and Agriculture Organization of the United Nations.
39. Madkour FF, Kamil AE-W, Nasr HS (2012) Production and nutritive value of *Spirulina platensis* in reduced cost media. *The Egyptian Journal of Aquatic Research* 38: 51–57.
40. Gamble MM, Sarker PK, Kapuscinski AR, Kelson S, Fitzgerald DS, et al. (2021) Toward environmentally sustainable aquafeeds: Managing phosphorus discharge from Nile tilapia (*Oreochromis niloticus*) aquaculture with microalgae-supplemented diets. *Elem Sci Anth* 9: 00170.
41. Mansour AT, Ashour M, Abbas EM, Alsaqufi AS, Kelany MS, et al. (2022) Growth Performance, Immune-Related and Antioxidant Genes Expression, and Gut Bacterial Abundance of Pacific White Leg Shrimp, *Litopenaeus vannamei*, Dietary Supplemented With Natural Astaxanthin. *Frontiers in Physiology* 13. <https://doi.org/10.3389/fphys.2022.874172> PMID: 35812341
42. Sharawy ZZ, Ashour M, Labena A, A.S. A, T MA, et al. (2022) Effects of dietary *Arthrospira platensis* nanoparticles on growth performance, feed utilization, and growth-related gene expression of Pacific white shrimp, *Litopenaeus vannamei*. *Aquaculture* 551: 737905.
43. Elsayed BB, El-Hais A (2012) Use of spirulina (*Arthrospira fusiformis*) for promoting growth of Nile Tilapia fingerlings. *African Journal of Microbiology Research* 6: 6423–6431.
44. Abu-Elala N, Galal M, Abd-Elsalam R, Mohey-Elsaeed O, Ragaa N (2016) Effects of dietary supplementation of *Spirulina platensis* and garlic on the growth performance and expression levels of immune-related genes in Nile tilapia (*Oreochromis niloticus*). *Journal of Aquaculture Research and Development* 7: 433–442.
45. Ungsethaphand T, Peerapornpisal Y, Whangchai N, Sardud U (2010) Effect of feeding *Spirulina platensis* on growth and carcass composition of hybrid red tilapia (*Oreochromis mossambicus* × *O. niloticus*). *Maejo international journal of science and technology* 4: 331–336.
46. Sarr SM, Fall J, Thiam A, Barry RO (2019) Growth and survival of red tilapia (*Oreochromis aureus* × *Oreochromis mossambicus*) fry fed on corn and soy meal, peanut meal and fishmeal enriched with spirulina (*Spirulina platensis*). *Int J Agric Policy Res* 7: 1–9.

47. Nandeesh M, Gangadhar B, Varghese T, Keshavanath P (1998) Effect of feeding *Spirulina platensis* on the growth, proximate composition and organoleptic quality of common carp, *Cyprinus carpio* L. *Aquaculture Research* 29: 305–312.
48. Nandeesh M, Gangadhara B, Manissery J, Venkataraman L (2001) Growth performance of two Indian major carps, catla (*Catla catla*) and rohu (*Labeo rohita*) fed diets containing different levels of *Spirulina platensis*. *Bioresource Technology* 80: 117–120. [https://doi.org/10.1016/s0960-8524\(01\)00085-2](https://doi.org/10.1016/s0960-8524(01)00085-2) PMID: 11563701
49. Faheem M, Jamal R, Nazeer N, Khaliq S, Hoseinifar SH, et al. (2022) Improving Growth, Digestive and Antioxidant Enzymes and Immune Response of Juvenile Grass Carp (*Ctenopharyngodon idella*) by Using Dietary *Spirulina platensis*. *Fishes* 7: 237.
50. Teimouri M, Amirkolaie AK, Yeganeh S (2013) The effects of *Spirulina platensis* meal as a feed supplement on growth performance and pigmentation of rainbow trout (*Oncorhynchus mykiss*). *Aquaculture* 396: 14–19.
51. Ren HT, Du MX, Zhou J, An HY (2022) Effect of *Spirulina* and ferrous fumarate on intestinal morphology and the diversity of gut microbiota of Yellow River carp. *Biological Trace Element Research* 200: 4142–4149. <https://doi.org/10.1007/s12011-021-02993-8> PMID: 34718961
52. Siddik MA, Vatsos IN, Rahman MA, Pham HD (2022) Selenium-Enriched *Spirulina* (SeE-SP) Enhance Antioxidant Response, Immunity, and Disease Resistance in Juvenile Asian Seabass, *Lateolabrax niloticus*. *Antioxidants* 11: 1572. <https://doi.org/10.3390/antiox11081572> PMID: 36009291
53. Guroy B, Guroy D, Bilen S, Kenanoglu ON, Sahin I, et al. (2022) Effect of dietary spirulina (*Arthrospira platensis*) on the growth performance, immune related gene expression and resistance to *Vibrio anguillarum* in European seabass (*Dicentrarchus labrax*). *Aquaculture Research* 53: 2263–2274.
54. Mg Mustafa, Umino T, Miyake H, Nakagawa H (1994) Effect of *Spirulina* sp. meal as feed additive on lipid accumulation in red sea bream. *Aquaculture Science* 42: 363–369.
55. Ghaeni M, Matinfar A, Soltani M, Rabbani M (2011) Comparative effects of pure spirulina powder and other diets on larval growth and survival of green tiger shrimp, *Penaeus semisulcatus*.
56. Kim C-J, Yoon S-K, Kim H-I, Park Y-H, Oh H-M (2006) Effect of *Spirulina platensis* and probiotics as feed additives on growth of shrimp *Fenneropenaeus chinensis*. *Journal of microbiology and biotechnology* 16: 1248–1254.
57. Abdel-Warith A-WA, El-Bab AFF, Younis E-SM, Al-Asgah NA, Allam HY, et al. (2020) Using of chitosan nanoparticles (CsNPs), *Spirulina* as a feed additives under intensive culture system for black tiger shrimp (*Penaeus monodon*). *Journal of King Saud University-Science* 32: 3359–3363.
58. Abadjieva D, Shumkov K, Kistanova E, Kacheva D, Georgiev B (2011) Opportunities for the improvement of the reproductive performances in female animals. *Biotechnology in Animal Husbandry* 27: 365–372.
59. Yener NA, Sinanoglu O, Ilter E, Celik A, Sezgin G, et al. (2013) Effects of spirulina on cyclophosphamide-induced ovarian toxicity in rats: biochemical and histomorphometric evaluation of the ovary. *Biochemistry research international* 2013. <https://doi.org/10.1155/2013/764262> PMID: 23762559
60. Khalifa E, Hassanien HA, Mohamed A, Hussein A, Abd-Elal AA (2016) Influence of addition *Spirulina platensis* algae powder on reproductive and productive performance of dairy *Zarabi* goats. *Egyptian Journal of Nutrition and Feeds* 19: 211–225.
61. Beresto V (2001) Our experience in spirulina feeding to minks in the reproduction period. *Scientifur* 25: 11–15.
62. Iatrou AM, Papadopoulos GA, Giannenas I, Lymberopoulos A, Fortomaris P (2022) Effects of Dietary Inclusion of *Spirulina platensis* on the Reproductive Performance of Female Mink. *Veterinary Sciences* 9: 428.
63. Alprol AE, Heneash AMM, Ashour M, Abualnaja KM, Alhashmialameer D, et al. (2021) Potential Applications of *Arthrospira platensis* Lipid-Free Biomass in Bioremediation of Organic Dye from Industrial Textile Effluents and Its Influence on Marine Rotifer (*Brachionus plicatilis*). *Materials (Basel)* 14. <https://doi.org/10.3390/ma14164446> PMID: 34442968
64. Ashour M, Alprol AE, Heneash AMM, Saleh H, Abualnaja KM, et al. (2021) Ammonia Bioremediation from Aquaculture Wastewater Effluents Using *Arthrospira platensis* NIOF17/003: Impact of Biodiesel Residue and Potential of Ammonia-Loaded Biomass as Rotifer Feed. *Materials (Basel)* 14: 5460. <https://doi.org/10.3390/ma14185460> PMID: 34576683
65. Ashour M, Mabrouk MM, Ayoub HF, El-Feky MMMM Z, SZ, et al. (2020) Effect of dietary seaweed extract supplementation on growth, feed utilization, hematological indices, and non-specific immunity of Nile Tilapia, *Oreochromis niloticus* challenged with *Aeromonas hydrophila*. *Journal of Applied Phycology* 32: 3467–3479.



66. Abualnaja KM, Alprol AE, Abu-Saied MA, Ashour M, Mansour AT (2021) Removing of Anionic Dye from Aqueous Solutions by Adsorption Using of Multiwalled Carbon Nanotubes and Poly (Acrylonitrile-styrene) Impregnated with Activated Carbon. *Sustainability* 13: 7077.
67. Mansour AT, Alprol AE, Khedawy M, Abualnaja KM, Shalaby TA, et al. (2022) Green Synthesis of Zinc Oxide Nanoparticles Using Red Seaweed for the Elimination of Organic Toxic Dye from an Aqueous Solution. *Materials* 15: 5169. <https://doi.org/10.3390/ma15155169> PMID: 35897601
68. Alprol AE, Mansour AT, El-Beltagi HS, Ashour M (2023) Algal Extracts for Green Synthesis of Zinc Oxide Nanoparticles: Promising Approach for Algae Bioremediation. *Materials (Basel)* 16: 2819. <https://doi.org/10.3390/ma16072819> PMID: 37049112
69. Mei N, Hedberg J, Ekvall MT, Kelpsiene E, Hansson L-A, et al. (2021) Transfer of cobalt nanoparticles in a simplified food web: From algae to zooplankton to fish. *Applied Nano* 2: 184–205.
70. Elabd H, Wang H-P, Shaheen A, Matter A (2020) Nano spirulina dietary supplementation augments growth, antioxidative and immunological reactions, digestion, and protection of Nile tilapia, *Oreochromis niloticus*, against *Aeromonas veronii* and some physical stressors. *Fish physiology and biochemistry* 46: 2143–2155. <https://doi.org/10.1007/s10695-020-00864-y> PMID: 32829476
71. Rajapaksha DC, Edirisinghe SL, Nikapitiya C, Dananjaya S, Kwun H-J, et al. (2020) Spirulina maxima derived pectin nanoparticles enhance the immunomodulation, stress tolerance, and wound healing in zebrafish. *Marine drugs* 18: 556. <https://doi.org/10.3390/md18110556> PMID: 33171870
72. Prichard RK, Basanez M-G, Boatman BA, McCarthy JS, Garcia HH, et al. (2012) A research agenda for helminth diseases of humans: intervention for control and elimination. *PLoS neglected tropical diseases* 6: e1549. <https://doi.org/10.1371/journal.pntd.0001549> PMID: 22545163
73. APHA (2005) Standard methods for the examination of water and wastewater. American Public Health Association (APHA): Washington, DC, USA.
74. AOAC (2003) Official methods of analysis of the Association of Official Analytical Chemists: The Association.
75. Abbas EM, Al-Souti AS, Sharawy ZZ, El-Haroun E, Ashour M (2023) Impact of Dietary Administration of Seaweed Polysaccharide on Growth, Microbial Abundance, and Growth and Immune-Related Genes Expression of The Pacific Whiteleg Shrimp (*Litopenaeus vannamei*). *Life* 13: 344. <https://doi.org/10.3390/life13020344> PMID: 36836701
76. Ferguson RM, Merrifield DL, Harper GM, Rawling MD, Mustafa S, et al. (2010) The effect of *Pediococcus acidilactici* on the gut microbiota and immune status of on-growing red tilapia (*Oreochromis niloticus*). *Journal of applied microbiology* 109: 851–862. <https://doi.org/10.1111/j.1365-2672.2010.04713.x> PMID: 20353430
77. FLOWRY O (1951) Protein measurement with the Folin phenol reagent. *J Biol Chem* 193: 265–275. PMID: 14907713
78. Wotton I, Freeman H (1982) *Microanalysis in Medical Biochemistry*. Churchill, New York, USA. Wie-gertjes, GF, RJM Stet, HK Parmentier and WB Van Muiswinkel, 1996. Immunogenetics of disease resistance in fish; a comparable approach *Dev. Comp Immunol* 20: 365–381.
79. Henry RJ (1964) *Clinical chemistry, principles and technics*.
80. McGowan MW, Artiss JD, Strandbergh DR, Zak B (1983) A peroxidase-coupled method for the colorimetric determination of serum triglycerides. *Clinical chemistry* 29: 538–542. PMID: 6825269
81. Cho BR, Hong KP, Choi JS, Park HS, Cho WH, et al. (1998) Release of cardiac troponin T after percutaneous transluminal coronary angioplasty. *Korean Circulation Journal* 28: 1069–1076.
82. Reitmann S (1957) Colorimetric method for the determination of serum glutamic pyruvate and glutamic oxaloacetate transaminase. *Amer J Clin Path* 28: 56.
83. Abraham WM (1977) Factors in delayed muscle soreness. *Medicine and science in sports* 9: 11–20. PMID: 870780
84. Beitins IO'loughlin K, Ostrea T, McArthur J (1976) Gonadotropin determinations in timed 3-hour urine collections during the menstrual cycle and LHRH testing. *The Journal of Clinical Endocrinology & Metabolism* 43: 46–55.
85. El-Sayed A-FM, Abdel-Aziz E-SH, Abdel-Ghani HM (2012) Effects of phytoestrogens on sex reversal of Nile tilapia (*Oreochromis niloticus*) larvae fed diets treated with 17 $\alpha$ -Methyltestosterone. *Aquaculture* 360: 58–63.
86. Abdelrhman AM, Ashour M, Al-Zahaby MA, Sharawy ZZ, Nazmi H, et al. (2022) Effect of polysaccharides derived from brown macroalgae *Sargassum dentifolium* on growth performance, serum biochemical, digestive histology and enzyme activity of hybrid red tilapia. *Aquaculture Reports* 25: 101212.

87. Nagarajan D, Varjani S, Lee D-J, Chang J-S (2021) Sustainable aquaculture and animal feed from microalgae—Nutritive value and techno-functional components. *Renewable and Sustainable Energy Reviews* 150: 111549.
88. Agarwal P, Gupta R, Agarwal N (2019) Advances in synthesis and applications of microalgal nanoparticles for wastewater treatment. *Journal of Nanotechnology* 2019.
89. Gambardella C, Gallus L, Gatti AM, Faimali M, Carbone S, et al. (2014) Toxicity and transfer of metal oxide nanoparticles from microalgae to sea urchin larvae. *Chemistry and Ecology* 30: 308–316.
90. Gomes FAL, da Silva Santos A, da Silva GV, da Silva MS, Correa MA, et al. (2020) Potencial do uso de nanopartículas de microalgas na produção de romãzeira. *Meio Ambiente (Brasil)* 1.
91. Raja R, Hemaiswarya S, Kumar NA, Sridhar S, Rengasamy R (2008) A perspective on the biotechnological potential of microalgae. *Critical reviews in microbiology* 34: 77–88. <https://doi.org/10.1080/10408410802086783> PMID: 18568862
92. Metwally AS, El-Naggar HA, El-Damhougy KA, Bashar MAE, Ashour M, et al. (2020) GC-MS analysis of bioactive components in six different crude extracts from the Soft Coral (*Sinularia maxim*) collected from Ras Mohamed, Aqaba Gulf, Red Sea, Egypt. *Egyptian Journal of Aquatic Biology & Fisheries* 24: 425–434.
93. El Basuini MF, Teiba II, Shahin SA, Mourad MM, Zaki MA, et al. (2022) Dietary Guduchi (*Tinospora cordifolia*) enhanced the growth performance, antioxidative capacity, immune response and ameliorated stress-related markers induced by hypoxia stress in Nile tilapia (*Oreochromis niloticus*). *Fish & shellfish immunology* 120: 337–344. <https://doi.org/10.1016/j.fsi.2021.12.002> PMID: 34883256
94. Mansour AT, Fayed WM, Elkhayat BK, Omar EA, Zaki MA, et al. (2021) Extract Dietary Supplementation Affects Growth Performance, Hematological and Physiological Status of European Seabass. *Annals of Animal Science* 21: 1043–1060.
95. Madibana MJ, Mlambo V, Lewis B, Fouché C (2017) Effect of graded levels of dietary seaweed (*Ulva* sp.) on growth, hematological and serum biochemical parameters in dusky kob, *Argyrosomus japonicus*, sciaenidae. *The Egyptian Journal of Aquatic Research* 43: 249–254.
96. Akbary P, Molazaei E, Aminikhoei Z (2018) Effect of dietary supplementation of *Ulva rigida* C. Agardh extract on several of physiological parameters of grey mullet, *Mugil cephalus* (Linnaeus). *Iranian Journal of Aquatic Animal Health* 4: 59–68.
97. Akbary P, Aminikhoei Z (2018) Effect of water-soluble polysaccharide extract from the green alga *Ulva rigida* on growth performance, antioxidant enzyme activity, and immune stimulation of grey mullet *Mugil cephalus*. *Journal of applied phycology* 30: 1345–1353.
98. Joshua WJ, Zulperi Z (2020) Effects of *Spirulina platensis* and *Chlorella vulgaris* on the Immune System and Reproduction of Fish. *Pertanika Journal of Tropical Agricultural Science* 43.
99. Qiang J, He J, Zhu J-H, Tao Y-F, Bao J-W, et al. (2021) Optimal combination of temperature and photoperiod for sex steroid hormone secretion and egg development of *Oreochromis niloticus* as determined by response surface methodology. *Journal of Thermal Biology* 97: 102889. <https://doi.org/10.1016/j.jtherbio.2021.102889> PMID: 33863448
100. Ajiboye OO, Okonji VA, Yakubu AF (2015) Effect of testosterone-induced sex reversal on the sex ratio, growth enhancement and survival of Nile tilapia (*Oreochromis niloticus*) fed coppens and farm produced feed in a semi flow-through culture system. *Fisheries and Aquaculture Journal* 6: 1.
101. Abdel-Latif HM, Khalil RH (2014) Evaluation of two phytobiotics, *Spirulina platensis* and *Origanum vulgare* extract on growth, serum antioxidant activities and resistance of Nile tilapia (*Oreochromis niloticus*) to pathogenic *Vibrio alginolyticus*. *Int J Fish Aquat Stud* 250: 250–255.
102. Promya J, Chitmanat C (2011) The effects of *Spirulina platensis* and *Cladophora* algae on the growth performance, meat quality and immunity stimulating capacity of the African Sharptooth Catfish (*Clarias gariepinus*). *International Journal of agriculture and Biology* 13: 77–82.
103. Geffroy B, Simon O (2013) Effects of a *Spirulina platensis*-based diet on zebrafish female reproductive performance and larval survival rate. *Cybium* 37: 31–38.
104. Hudaidah S, Putri B, Samara S, Adiputra Y. Effect of partial replacement of fish meal with *Spirulina platensis* meal in practical diets and culture location on growth, survival, and color enhancement of percula clownfish *Amphiprion percula*; 2019. IOP Publishing. pp. 012073.
105. Güroy B, Şahin İ, Mantoğlu S, Kayalı S (2012) *Spirulina* as a natural carotenoid source on growth, pigmentation and reproductive performance of yellow tail cichlid *Pseudotropheus acei*. *Aquaculture International* 20: 869–878.
106. Eryalcin K (2018) Effects of Different Commercial Feeds and Enrichments on Biochemical Composition and Fatty Acid Profile of Rotifer (*Brachionus Plicatilis*, Muller 1786) and *Artemia Franciscana*. *Turkish Journal of Fisheries and Aquatic Sciences* 18.

107. Meng-Umphun K (2009) Growth performance, sex hormone levels and maturation ability of Pla Pho (*Pangasius bocourti*) fed with Spirulina supplementary pellet and hormone application. *International journal of Agriculture and Biology* 11: 458–462.
108. Vasudhevan I, James R (2011) Effect of optimum Spirulina along with different levels of vitamin C incorporated diets on growth, reproduction and coloration in goldfish *Carassius auratus* (Linnaeus, 1758). *Indian Journal of Fisheries* 58: 101–106.
109. Hassaan MS (2022) Effects of Algal Diets Supplementation on Reproductive Performance Parameters of Nile Tilapia Broodstock. *Annals of Agricultural Science, Moshtohor* 60: 779–786.
